# Supplementary material
Source: Springer Nature journal article supplement (https://www.springermedizin.de/resource/supplementary/12943_2010_716_MOESM10_ESM.pdf/9554646)

### *MMP13*

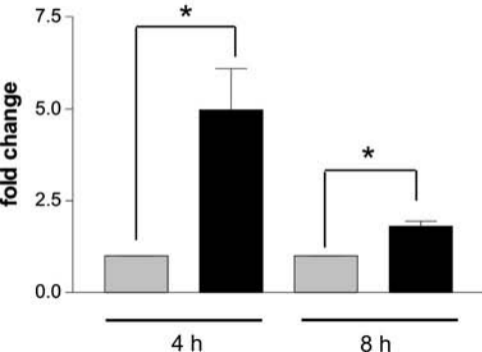

untreated  
EGF-treated

### *MMP13*

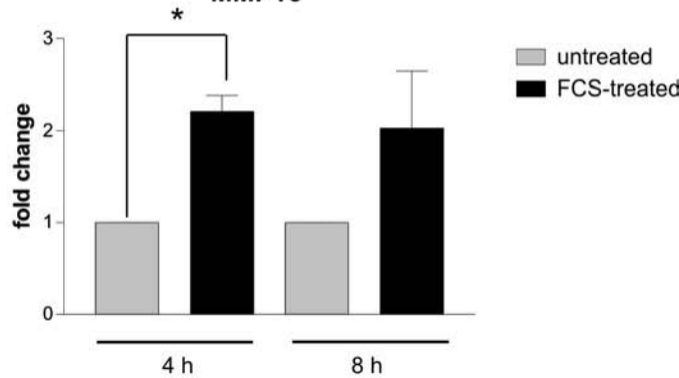

untreated  
FCS-treated

Supplement: MOESM10 [file 9554646]
